# Supplementary material for: Triangular boron carbon nitrides: an unexplored family of chromophores with unique properties for photocatalysis and optoelectronics
Source: Royal Society of Chemistry journal article supplement (doi:10.1039/d1cp02026a), 2021-01-01
Supplement: d1cp02026a1.pdf [file d1cp02026a1.pdf]

# Triangular boron carbon nitrides: An unexplored family of chromophores with unique properties for photocatalysis and optoelectronics

## Electronic Supporting Information

Sebastian Pios<sup>1</sup>, Xiang Huang<sup>1</sup>, Andrzej L. Sobolewski<sup>2</sup> and Wolfgang Domcke<sup>1\*</sup>

<sup>1</sup> Department of Chemistry, Technical University of Munich, 85747 Garching, Germany

<sup>2</sup> Institute of Physics, Polish Academy of Sciences, PL-02-668 Warsaw, Poland

\* corresponding author; Email: [domcke@ch.tum.de](mailto:domcke@ch.tum.de)

### Section S1: Additional data for the compounds of Chart 1

Table S1: Vertical excitation energies (in eV) and oscillator strengths (in parentheses) of **1.1**.

| Singlet |              | Triplet |      |
|---------|--------------|---------|------|
| $A_2'$  | 1.02 (0.000) | $A_2'$  | 1.18 |
| $E'$    | 3.14 (0.520) | $E'$    | 2.25 |
| $A_1''$ | 4.84 (0.000) | $E'$    | 4.27 |
| $E'$    | 5.07 (0.768) | $A_1''$ | 4.84 |

Table S2: Vertical excitation energies (in eV) and oscillator strengths (in parentheses) of **2.1**.

| Singlet |              | Triplet |      |
|---------|--------------|---------|------|
| $A_2'$  | 1.63 (0.000) | $E'$    | 1.91 |
| $A_1'$  | 2.25 (0.000) | $A_1'$  | 1.93 |
| $E'$    | 2.37 (0.586) | $A_2'$  | 1.94 |
| $E'$    | 3.16 (0.110) | $E'$    | 2.88 |

Table S3: Vertical excitation energies (in eV) and oscillator strengths (in parentheses) of **3.1**.

| Singlet |              | Triplet |      |
|---------|--------------|---------|------|
| $A_2'$  | 1.19 (0.000) | $A_2'$  | 1.42 |
| $E'$    | 2.27 (1.262) | $E'$    | 1.89 |
| $E'$    | 2.51 (0.000) | $E'$    | 2.36 |
| $A_2'$  | 2.91 (0.000) | $E'$    | 2.51 |
| $A_1'$  | 3.08 (0.000) | $A_1'$  | 2.78 |

## Section S2: Additional data for the compounds of Chart 2

Table S4: Vertical excitation energies (in eV) and oscillator strengths (in parentheses) of **1.2**.

| Singlet |              | Triplet |      |
|---------|--------------|---------|------|
| $A_2'$  | 2.57 (0.000) | $A_2'$  | 2.85 |
| $A_1''$ | 3.76 (0.000) | $E'$    | 3.67 |
| $E''$   | 3.84 (0.000) | $A_1''$ | 3.76 |
| $E'$    | 4.43 (0.538) | $E''$   | 3.82 |

Table S5: Vertical excitation energies (in eV) and oscillator strengths (in parentheses) of **2.2**.

| Singlet |              | Triplet |      |
|---------|--------------|---------|------|
| $A_2'$  | 2.22 (0.000) | $A_2'$  | 2.57 |
| $E'$    | 2.98 (0.446) | $E'$    | 2.67 |
| $A_1'$  | 3.21 (0.000) | $A_1'$  | 2.99 |
| $A_1''$ | 3.92 (0.000) | $E'$    | 3.49 |

Table S6: Vertical excitation energies (in eV) and oscillator strengths (in parentheses) of **3.2**.

| Singlet |              | Triplet |      |
|---------|--------------|---------|------|
| $A_2'$  | 1.91 (0.000) | $A_2'$  | 2.22 |
| $E'$    | 2.69 (0.966) | $E'$    | 2.36 |
| $E'$    | 3.14 (0.077) | $E'$    | 2.92 |
| $A_2'$  | 3.24 (0.000) | $E'$    | 3.02 |
| $E'$    | 3.40 (1.177) | $A_1'$  | 3.12 |

### Section S3: Molecular orbitals of Hz, Nz and Dz

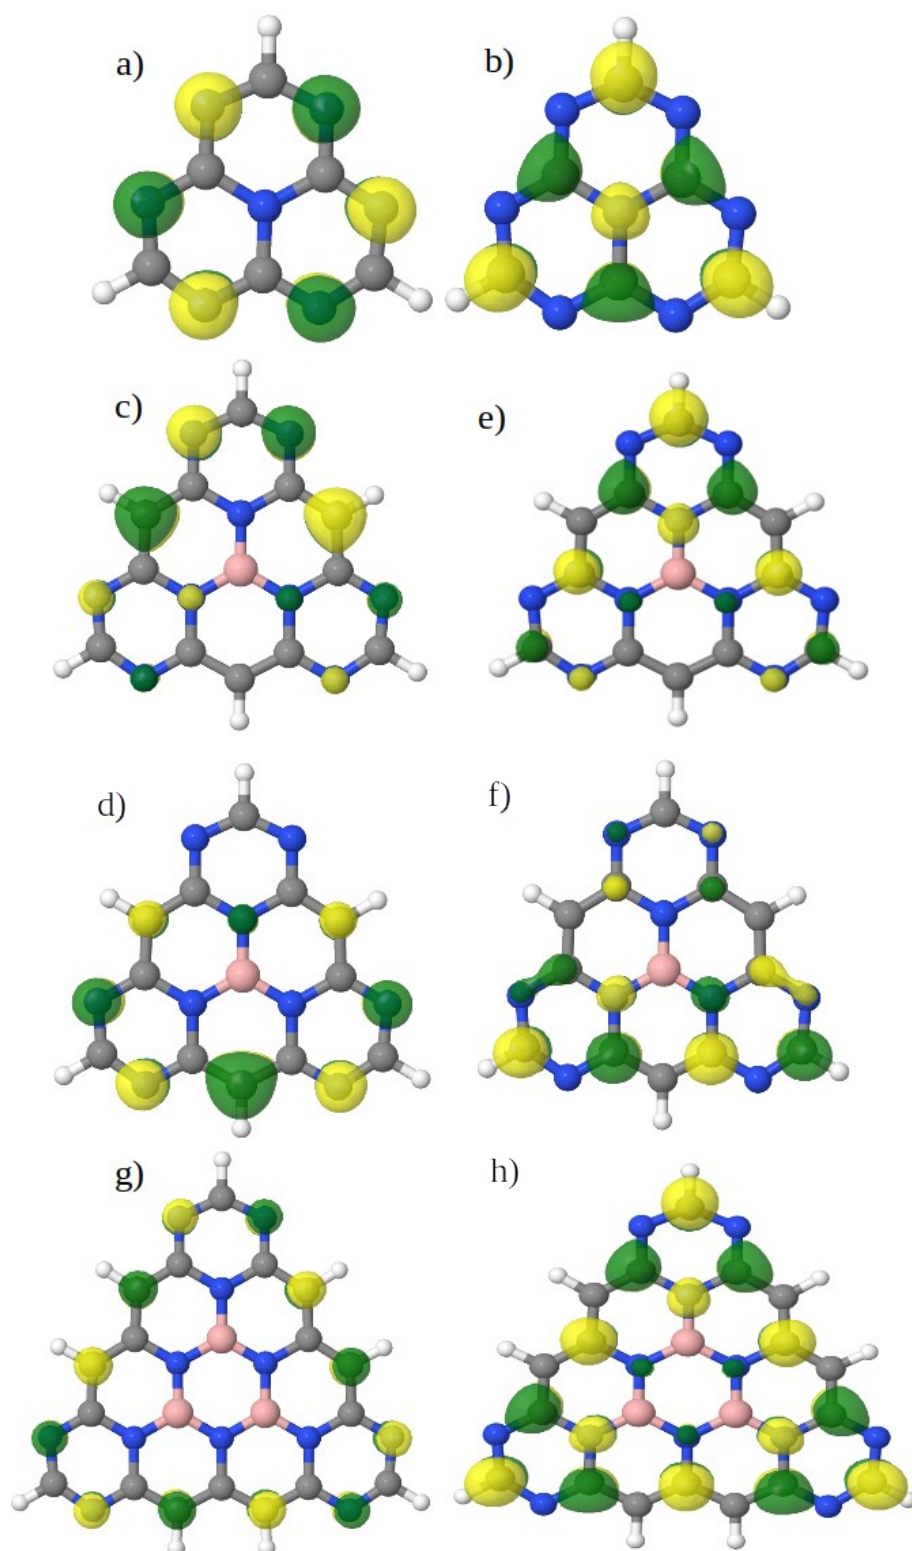

Figure S1: HOMO and LUMO of the molecules **1.2** (a and b), **2.2** (c, d and e, f) and **3.2** (g and h), respectively, at their ground-state equilibrium structures.

### Section S4: Selected asymmetrically CH → N substituted derivatives of 3.1

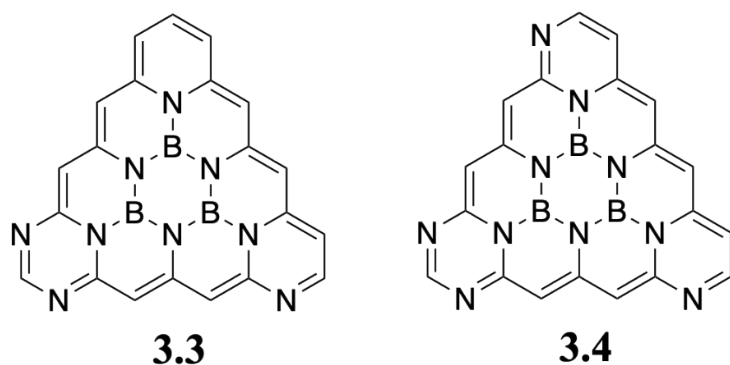

Chart S1: Selected asymmetrically CH → N substituted derivatives of 3.1.

Table S7: Vertical excitation energies (in eV) and oscillator strengths (in parentheses) for two selected asymmetrically CH → N substituted derivatives of 3.1. The corresponding structures are shown in Chart S1.

| State    | <b>3.3</b>   | <b>3.4</b>   |
|----------|--------------|--------------|
| $S_1 A'$ | 1.63 (0.020) | 1.68 (0.010) |
| $S_2 A'$ | 2.46 (0.429) | 2.44 (0.350) |
| $S_3 A'$ | 2.65 (0.645) | 2.63 (0.646) |
| $S_4 A'$ | 2.80 (0.084) | 2.92 (0.201) |
| $T_1 A'$ | 1.79         | 1.93         |
| $T_2 A'$ | 2.13         | 2.19         |
| $T_3 A'$ | 2.22         | 2.26         |
| $T_4 A'$ | 2.63         | 2.63         |

## Section S5: Additional selected fluorinated derivatives of nonazine

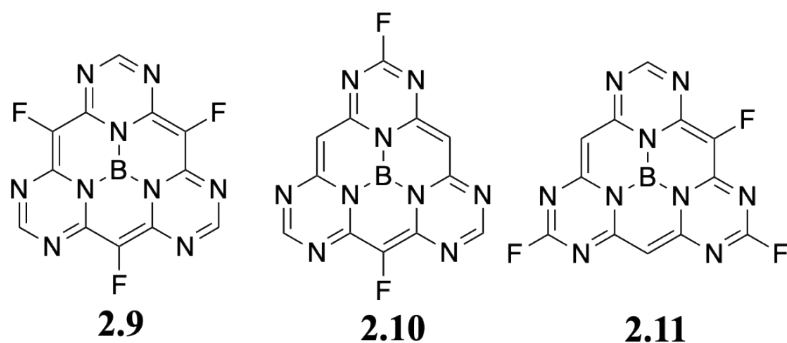

Chart S2: Selected fluorinated derivatives of Nz (**2.2**).

Table S8: Vertical excitation energies (in eV) and oscillator strengths (in parentheses) for selected fluorinated derivatives of Nz (**2.2**). **2.9** exhibits the lowest  $S_1$  energy, while **2.10** and **2.11** exhibit the highest oscillator strength of the  $S_1$  state. The corresponding structures are shown in Chart S2.

| State    | <b>2.9</b>   | <b>2.10</b>  | <b>2.11</b>  |
|----------|--------------|--------------|--------------|
| $S_1 A'$ | 1.86 (0.000) | 2.14 (0.022) | 2.26 (0.022) |
| $S_2 A'$ | 2.61 (0.350) | 2.92 (0.199) | 3.06 (0.168) |
| $S_3 A'$ | -            | 3.07 (0.162) | 3.14 (0.189) |
| $S_4 A'$ | 2.80 (0.000) | 3.20 (0.011) | 3.33 (0.016) |
| $T_1 A'$ | 2.18         | 2.29         | 2.41         |
| $T_2 A'$ | 2.27         | 2.64         | 2.75         |
| $T_3 A'$ | -            | 2.82         | 2.90         |
| $T_4 A'$ | 3.14         | 2.97         | 3.10         |

## Section S6: Selected fluorinated derivatives of dodecazine

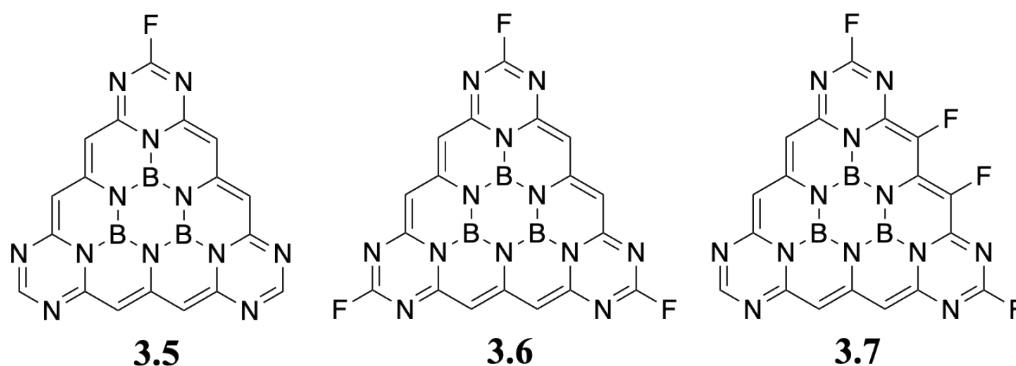

Chart S3: Selected fluorinated derivatives of Dz (**3.2**).

Table S9: Vertical excitation energies (in eV) and oscillator strengths (in parentheses) for selected fluorinated derivatives of Dz (**3.2**). The corresponding structures are shown in Chart S3.

| State | Symmetry       | <b>3.5</b>   | Symmetry         | <b>3.6</b>   | Symmetry       | <b>3.7</b>   |
|-------|----------------|--------------|------------------|--------------|----------------|--------------|
| $S_1$ | B <sub>2</sub> | 1.98 (0.006) | A <sub>2</sub> ' | 2.17 (0.000) | B <sub>2</sub> | 1.91 (0.015) |
| $S_2$ | A <sub>1</sub> | 2.70 (0.468) | E'               | 2.93 (1.040) | B <sub>2</sub> | 2.60 (0.547) |
| $S_3$ | B <sub>2</sub> | 2.85 (0.514) |                  | -            | A <sub>1</sub> | 2.79 (0.326) |
| $S_4$ | A <sub>1</sub> | 3.17 (0.017) | E'               | 3.35 (0.252) | B <sub>2</sub> | 2.96 (0.003) |
| $T_1$ | B <sub>2</sub> | 2.27         | A <sub>2</sub> ' | 2.48         | B <sub>2</sub> | 1.98         |
| $T_2$ | A <sub>1</sub> | 2.39         | E'               | 2.50         | B <sub>2</sub> | 2.32         |
| $T_3$ | B <sub>2</sub> | 2.45         |                  | -            | B <sub>2</sub> | 2.79         |
| $T_4$ | A <sub>1</sub> | 2.94         | E'               | 3.12         | B <sub>2</sub> | 2.95         |

### Section S7: Jahn-Teller-Effect in the <sup>3</sup>E' state of **2.1** and **2.2**

The JT effect in the <sup>3</sup>E' state as well as PJT interactions among the <sup>3</sup>A<sub>1</sub>', <sup>3</sup>A<sub>2</sub>' and <sup>3</sup>E' states arising from excitation from the degenerate HOMO to the degenerate LUMO remove the degeneracy of the <sup>3</sup>E' state and lead to a stabilization of the lower adiabatic potential energy. The components E<sub>x</sub> and E<sub>y</sub> of the E' state transform as the B<sub>1</sub> and A<sub>1</sub> representations in C<sub>2v</sub> symmetry, respectively. The minimum of the A<sub>1</sub> surface represents the minimum of the (P)JT distorted surface of the E' state. The B<sub>1</sub> surface exhibits a stationary point which represents the saddle point for the so-called pseudorotation. The difference between the vertical excitation energy of the E' state and the minimum of the A<sub>1</sub> state is the (P)JT stabilization energy.

The excitation energies from the electronic ground state to the minima and saddle points of the <sup>3</sup>E' surface (adiabatic excitation energies) are listed in Tables S10 and S11 for **2.1** and **2.2**, respectively. The energies for vertical emission from the excited-state stationary points to the electronic ground state (vertical emission energies) are also listed in Tables S10 and S11.

A schematic representation of the potential-energy surfaces of the <sup>1</sup>A<sub>2</sub>', <sup>3</sup>A<sub>2</sub>' and <sup>3</sup>E' states of **2.1** and **2.2** is given by Fig. S2. For clarity, only the lower component of the <sup>3</sup>E' surface is shown. For **2.1**, the (P)JT coupling reduces the vertical S<sub>1</sub>-T<sub>1</sub> gap of - 0.28 eV to an adiabatic S<sub>1</sub>-T<sub>1</sub> gap of merely - 0.02 eV. For **2.2**, the (P)JT coupling reduces the vertical S<sub>1</sub>-T<sub>1</sub> gap of - 0.35 eV to an adiabatic S<sub>1</sub>-T<sub>1</sub> gap of - 0.28 eV.

It can be seen in Tables S10 and S11 and in Fig. S2 that for the nondegenerate states (<sup>1</sup>A<sub>2</sub>', <sup>3</sup>A<sub>2</sub>') the difference between the adiabatic excitation energies and the vertical emission energies is very small, which reflects the unusual rigidity of the BCNs in nondegenerate excited states.

Table S10: Adiabatic excitation energies ( $E_a$ ), vertical emission energies ( $E_{em}$ ) (in eV) and leading electronic configurations of the lowest excited states of **2.1** calculated with the ADC(2)/cc-pVDZ method at the respective ADC(2)-optimized geometries.

| State                                                       | $E_a$ | $E_{em}$ | electronic configuration                                                        |
|-------------------------------------------------------------|-------|----------|---------------------------------------------------------------------------------|
| <sup>1</sup> A <sub>2</sub> '                               | 1.59  | 1.58     | 0.70(5a <sub>2</sub> -8b <sub>2</sub> )+0.70(7b <sub>2</sub> -6a <sub>2</sub> ) |
| <sup>3</sup> E <sub>y</sub> ( <sup>3</sup> A <sub>1</sub> ) | 1.61  | 1.27     | 0.98(5a <sub>2</sub> -6a <sub>2</sub> )                                         |
| <sup>3</sup> E <sub>x</sub> ( <sup>3</sup> B <sub>1</sub> ) | 1.85  | 1.80     | 0.98(7b <sub>2</sub> -6a <sub>2</sub> )                                         |
| <sup>3</sup> A <sub>2</sub> '                               | 1.91  | 1.90     | 0.70(5a <sub>2</sub> -8b <sub>2</sub> )+0.70(7b <sub>2</sub> -6a <sub>2</sub> ) |

Table S11: Adiabatic excitation energies ( $E_a$ ), vertical emission energies ( $E_m$ ) (in eV) and leading electronic configurations of the lowest excited states of **2.2** calculated with the ADC(2)/cc-pVDZ method at the respective ADC(2)-optimized geometries.

| State          | $E_a$ | $E_m$ | electronic configuration          |
|----------------|-------|-------|-----------------------------------|
| $^1A_2'$       | 2.17  | 2.14  | $0.69(5a_2-8b_2)-0.69(7b_2-6a_2)$ |
| $^3E_y(^3A_1)$ | 2.45  | 1.94  | $0.97(7b_2-8b_2)$                 |
| $^3E_x(^3B_1)$ | 2.50  | 2.42  | $0.95(5a_2-8b_2)$                 |
| $^3A_2'$       | 2.52  | 2.49  | $0.70(5a_2-8b_2)-0.70(7b_2-6a_2)$ |

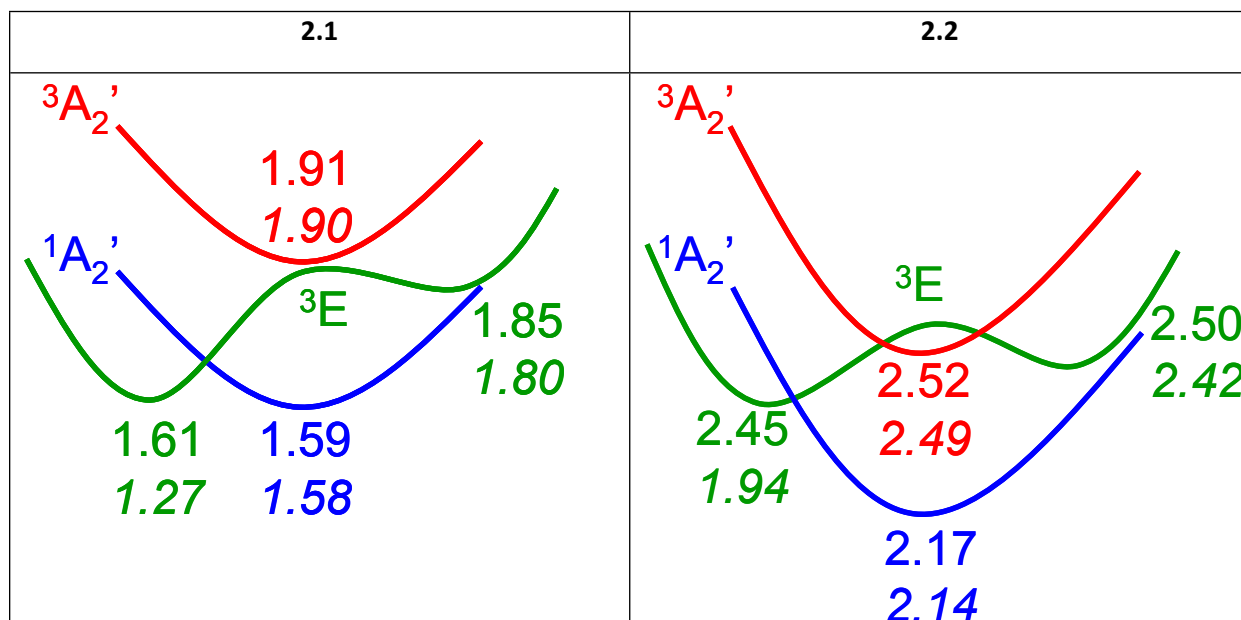

Figure S2: Schematic representation of the potential-energy surfaces of the  $^1A_2'$ ,  $^3A_2'$  and  $^3E'$  states of compounds **2.1** and **2.2**. Adiabatic excitation energies are given by roman fonts; vertical emission energies are given by italic fonts (see Tables S10 and S11).

## Section S8: Cartesian coordinates

Cartesian coordinates in Angstrom of Cz (**1.1**) at the MP2/cc-pVDZ level.

|   |            |            |           |
|---|------------|------------|-----------|
| C | -2.1261712 | -1.2025280 | 0.0000000 |
| C | -0.7073599 | -1.2251833 | 0.0000000 |
| N | 0.0000000  | 0.0000000  | 0.0000000 |
| C | -0.7073599 | 1.2251833  | 0.0000000 |
| C | -2.1261712 | 1.2025280  | 0.0000000 |
| C | -2.8275277 | 0.0000000  | 0.0000000 |
| C | 1.4147198  | 0.0000000  | 0.0000000 |
| C | 2.1045054  | 1.2400543  | 0.0000000 |
| C | 1.4137639  | 2.4487108  | 0.0000000 |
| C | 0.0216658  | 2.4425823  | 0.0000000 |
| C | 0.0216658  | -2.4425823 | 0.0000000 |
| C | 1.4137639  | -2.4487108 | 0.0000000 |
| C | 2.1045054  | -1.2400543 | 0.0000000 |
| H | -2.6372860 | 2.1682456  | 0.0000000 |
| H | -0.5591128 | 3.3680794  | 0.0000000 |
| H | 3.1963988  | 1.1998339  | 0.0000000 |
| H | 3.1963988  | -1.1998339 | 0.0000000 |
| H | -0.5591128 | -3.3680794 | 0.0000000 |
| H | -2.6372860 | -2.1682456 | 0.0000000 |
| H | -3.9229787 | 0.0000000  | 0.0000000 |
| H | 1.9614894  | -3.3973992 | 0.0000000 |
| H | 1.9614894  | 3.3973992  | 0.0000000 |



Cartesian coordinates in Angstrom of Hz (**1.2**) at the MP2/cc-pVDZ level.

|   |            |            |           |
|---|------------|------------|-----------|
| N | -2.3770694 | 0.0167866  | 0.0000000 |
| C | -1.2302088 | -0.6816424 | 0.0000000 |
| N | -0.0000035 | 0.0000018  | 0.0000000 |
| C | 0.0247821  | 1.4061780  | 0.0000000 |
| N | -1.1300922 | 2.0913252  | 0.0000000 |
| C | -2.2459412 | 1.3500242  | 0.0000000 |
| C | 1.2054004  | -0.7245397 | 0.0000000 |
| N | 2.3761902  | -0.0669661 | 0.0000000 |
| C | 2.2921121  | 1.2700625  | 0.0000000 |
| N | 1.2030653  | 2.0502198  | 0.0000000 |
| N | -1.2460863 | -2.0243537 | 0.0000000 |
| C | -0.0461543 | -2.6200497 | 0.0000000 |
| N | 1.1740040  | -2.0669785 | 0.0000000 |
| H | -3.1857918 | 1.9149024  | 0.0000000 |
| H | -0.0655010 | -3.7164210 | 0.0000000 |
| H | 3.2512947  | 1.8014504  | 0.0000000 |

Cartesian coordinates in Angstrom of **2.1** at the MP2/cc-pVDZ level.

|   |            |            |           |
|---|------------|------------|-----------|
| C | -0.7292978 | 3.6862196  | 0.0000000 |
| C | -0.0040452 | 2.4749592  | 0.0000000 |
| N | -0.7261856 | 1.2577904  | 0.0000000 |
| C | -2.1413550 | 1.2409829  | 0.0000000 |
| C | -2.8277109 | 2.4747002  | 0.0000000 |
| C | -2.1263455 | 3.6829384  | 0.0000000 |
| C | -2.7962504 | 0.0000000  | 0.0000000 |
| C | -2.1413550 | -1.2409829 | 0.0000000 |
| N | -0.7261856 | -1.2577904 | 0.0000000 |
| C | -0.0040452 | -2.4749592 | 0.0000000 |
| C | -0.7292978 | -3.6862196 | 0.0000000 |
| C | -2.1263455 | -3.6829384 | 0.0000000 |
| C | -2.8277109 | -2.4747002 | 0.0000000 |
| C | 1.3981252  | -2.4216239 | 0.0000000 |

|   |            |            |           |
|---|------------|------------|-----------|
| C | 2.1454002  | -1.2339764 | 0.0000000 |
| N | 1.4523712  | 0.0000000  | 0.0000000 |
| C | 2.1454002  | 1.2339764  | 0.0000000 |
| C | 3.5570087  | 1.2115194  | 0.0000000 |
| C | 4.2526910  | 0.0000000  | 0.0000000 |
| C | 3.5570087  | -1.2115194 | 0.0000000 |
| B | 0.0000000  | 0.0000000  | 0.0000000 |
| C | 1.3981252  | 2.4216239  | 0.0000000 |
| H | -2.6741502 | -4.6317640 | 0.0000000 |
| H | -3.8889339 | 0.0000000  | 0.0000000 |
| H | -2.6741502 | 4.6317640  | 0.0000000 |
| H | 1.9444670  | 3.3679156  | 0.0000000 |
| H | 1.9444670  | -3.3679156 | 0.0000000 |
| H | 5.3483004  | 0.0000000  | 0.0000000 |
| H | -3.9207361 | -2.4500906 | 0.0000000 |
| H | -3.9207361 | 2.4500906  | 0.0000000 |
| H | -0.1614726 | 4.6205024  | 0.0000000 |
| H | 4.0822088  | 2.1704118  | 0.0000000 |
| H | 4.0822088  | -2.1704118 | 0.0000000 |
| H | -0.1614726 | -4.6205024 | 0.0000000 |

Cartesian coordinates in Angstrom of Nz(2.2) at the MP2/cc-pVDZ level.

|   |            |            |           |
|---|------------|------------|-----------|
| N | 3.4842312  | 1.2145238  | 0.0000000 |
| C | 2.1335374  | 1.2174790  | 0.0000000 |
| N | 1.4327146  | 0.0000000  | 0.0000000 |
| C | 2.1335374  | -1.2174790 | 0.0000000 |
| N | 3.4842312  | -1.2145238 | 0.0000000 |
| C | 4.0562904  | 0.0000000  | 0.0000000 |
| C | 1.3918435  | -2.4107437 | 0.0000000 |
| C | -0.0124010 | -2.4564371 | 0.0000000 |
| N | -0.7163573 | -1.2407672 | 0.0000000 |
| B | 0.0000000  | 0.0000000  | 0.0000000 |
| C | 1.3918435  | 2.4107437  | 0.0000000 |
| C | -0.0124010 | 2.4564371  | 0.0000000 |

|   |            |            |           |
|---|------------|------------|-----------|
| N | -0.7163573 | 1.2407672  | 0.0000000 |
| N | -0.6903071 | -3.6246947 | 0.0000000 |
| H | 5.1533873  | 0.0000000  | 0.0000000 |
| N | -0.6903071 | 3.6246947  | 0.0000000 |
| C | -2.1211364 | -1.2389581 | 0.0000000 |
| C | -2.1211364 | 1.2389581  | 0.0000000 |
| C | -2.0281452 | 3.5128505  | 0.0000000 |
| C | -2.0281452 | -3.5128505 | 0.0000000 |
| N | -2.7939241 | 2.4101709  | 0.0000000 |
| N | -2.7939241 | -2.4101709 | 0.0000000 |
| C | -2.7836870 | 0.0000000  | 0.0000000 |
| H | 1.9368801  | -3.3547748 | 0.0000000 |
| H | -2.5766936 | -4.4629643 | 0.0000000 |
| H | -3.8737602 | 0.0000000  | 0.0000000 |
| H | 1.9368801  | 3.3547748  | 0.0000000 |
| H | -2.5766936 | 4.4629643  | 0.0000000 |

Cartesian coordinates in Angstrom of **3.1** at the MP2/cc-pVDZ level.

|   |            |           |            |
|---|------------|-----------|------------|
| C | -1.2143575 | 0.0000000 | 4.9822765  |
| C | -1.2349458 | 0.0000000 | 3.5690907  |
| N | 0.0000000  | 0.0000000 | 2.8873311  |
| C | 1.2349458  | 0.0000000 | 3.5690907  |
| C | 1.2143575  | 0.0000000 | 4.9822765  |
| C | 0.0000000  | 0.0000000 | 5.6737176  |
| C | -2.4269998 | 0.0000000 | 2.8193792  |
| C | -2.4782067 | 0.0000000 | 1.4179996  |
| C | -3.6662591 | 0.0000000 | 0.6729879  |
| C | -3.7195022 | 0.0000000 | -0.7341992 |
| N | -2.5115608 | 0.0000000 | -1.4627794 |
| C | -2.4844906 | 0.0000000 | -2.8731675 |
| C | -3.7186463 | 0.0000000 | -3.5619464 |
| C | -4.9246499 | 0.0000000 | -2.8560505 |
| C | -4.9330330 | 0.0000000 | -1.4586714 |
| B | -1.2527563 | 0.0000000 | -0.7360746 |

|   |            |           |            |
|---|------------|-----------|------------|
| N | -1.2497769 | 0.0000000 | 0.7087960  |
| B | 0.0000000  | 0.0000000 | 1.4337763  |
| N | 1.2497769  | 0.0000000 | 0.7087960  |
| C | 2.4782067  | 0.0000000 | 1.4179996  |
| C | 3.6662591  | 0.0000000 | 0.6729879  |
| C | 3.7195022  | 0.0000000 | -0.7341992 |
| N | 2.5115608  | 0.0000000 | -1.4627794 |
| C | 2.4844906  | 0.0000000 | -2.8731675 |
| C | 3.7186463  | 0.0000000 | -3.5619464 |
| C | 4.9246499  | 0.0000000 | -2.8560505 |
| C | 4.9330330  | 0.0000000 | -1.4586714 |
| B | 1.2527563  | 0.0000000 | -0.7360746 |
| N | 0.0000000  | 0.0000000 | -1.4559217 |
| C | 0.0000000  | 0.0000000 | -2.8743701 |
| C | -1.2392465 | 0.0000000 | -3.5307117 |
| C | 1.2392465  | 0.0000000 | -3.5307117 |
| C | 2.4269998  | 0.0000000 | 2.8193792  |
| H | 0.0000000  | 0.0000000 | 6.7696094  |
| H | -5.8736764 | 0.0000000 | -3.4040513 |
| H | 5.8736764  | 0.0000000 | -3.4040513 |
| H | -4.6164788 | 0.0000000 | 1.2130589  |
| H | -3.3697978 | 0.0000000 | 3.3723073  |
| H | 3.3697978  | 0.0000000 | 3.3723073  |
| H | 4.6164788  | 0.0000000 | 1.2130589  |
| H | -1.2467256 | 0.0000000 | -4.6236588 |
| H | 1.2467256  | 0.0000000 | -4.6236588 |
| H | -3.6973354 | 0.0000000 | -4.6547666 |
| H | 3.6973354  | 0.0000000 | -4.6547666 |
| H | -5.8687629 | 0.0000000 | -0.8937602 |
| H | 5.8687629  | 0.0000000 | -0.8937602 |
| H | 2.1713971  | 0.0000000 | 5.5102593  |
| H | -2.1713971 | 0.0000000 | 5.5102593  |

Cartesian coordinates in Angstrom of Dz (3.2) at the MP2/cc-pVDZ level.

|   |            |            |           |
|---|------------|------------|-----------|
| B | -0.7169416 | 1.2417793  | 0.0000000 |
| N | -1.4439754 | 0.0000000  | 0.0000000 |
| B | -0.7169416 | -1.2417793 | 0.0000000 |
| N | 0.7219877  | -1.2505193 | 0.0000000 |
| B | 1.4338832  | 0.0000000  | 0.0000000 |
| N | 0.7219877  | 1.2505193  | 0.0000000 |
| N | 2.8682226  | 0.0000000  | 0.0000000 |
| N | -1.4341113 | 2.4839536  | 0.0000000 |
| N | -1.4341113 | -2.4839536 | 0.0000000 |
| C | 1.4275984  | 2.4726730  | 0.0000000 |
| C | 1.4275984  | -2.4726730 | 0.0000000 |
| C | -2.8551968 | 0.0000000  | 0.0000000 |
| C | -2.8401170 | 2.4816614  | 0.0000000 |
| C | -0.7291233 | 3.7004441  | 0.0000000 |
| C | 3.5692403  | 1.2187828  | 0.0000000 |
| C | 3.5692403  | -1.2187828 | 0.0000000 |
| C | -2.8401170 | -2.4816614 | 0.0000000 |
| C | -0.7291233 | -3.7004441 | 0.0000000 |
| N | -1.4084135 | 4.8701842  | 0.0000000 |
| N | -3.5134965 | 3.6548140  | 0.0000000 |
| C | -2.7463162 | 4.7567593  | 0.0000000 |
| N | 4.9219100  | -1.2153703 | 0.0000000 |
| N | 4.9219100  | 1.2153703  | 0.0000000 |
| C | 5.4926325  | 0.0000000  | 0.0000000 |
| N | -1.4084135 | -4.8701842 | 0.0000000 |
| N | -3.5134965 | -3.6548140 | 0.0000000 |
| C | -2.7463162 | -4.7567593 | 0.0000000 |
| C | 0.6750714  | 3.6646625  | 0.0000000 |
| C | 2.8361552  | 2.4169602  | 0.0000000 |
| C | 0.6750714  | -3.6646625 | 0.0000000 |
| C | 2.8361552  | -2.4169602 | 0.0000000 |
| C | -3.5112265 | -1.2477023 | 0.0000000 |

|   |            |            |           |
|---|------------|------------|-----------|
| C | -3.5112265 | 1.2477023  | 0.0000000 |
| H | -3.2950197 | 5.7071415  | 0.0000000 |
| H | 6.5900394  | 0.0000000  | 0.0000000 |
| H | -3.2950197 | -5.7071415 | 0.0000000 |
| H | 3.4152579  | 3.3420343  | 0.0000000 |
| H | 1.1866576  | 4.6287172  | 0.0000000 |
| H | -4.6019155 | 1.2866830  | 0.0000000 |
| H | -4.6019155 | -1.2866830 | 0.0000000 |
| H | 3.4152579  | -3.3420343 | 0.0000000 |
| H | 1.1866576  | -4.6287172 | 0.0000000 |
